# Supplementary material for: An upconversion fluorescent resonant energy transfer biosensor for hepatitis B virus (HBV) DNA hybridization detection
Source: Royal Society of Chemistry journal article supplement (doi:10.1039/c5an01634g), 2015-01-01
Supplement: c5an01634g1.pdf [file c5an01634g1.pdf]

SI

# An Upconversion Fluorescent Resonant Energy Transfer Biosensor for Hepatitis B Virus ( HBV ) DNA Hybridization Detection

Hao Zhu, Feng Lu, Xing-Cai Wu\* and Jun-Jie Zhu\*

State Key Laboratory of Analytical Chemistry for Life Science, Collaborative Innovation Center of Chemistry for Life Science, School of Chemistry and Chemical Engineering, Nanjing University, Nanjing, 210093, P. R. China.

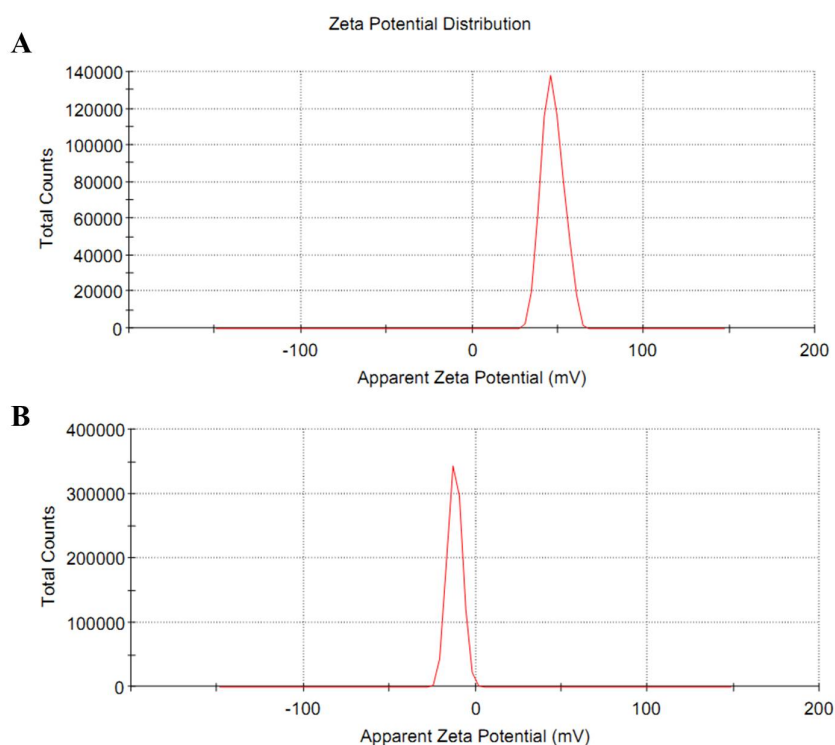

**Fig. S1** Zeta potential distributions of NH<sub>2</sub>-UCNPs (A) and UCNPs- seq 1(B).

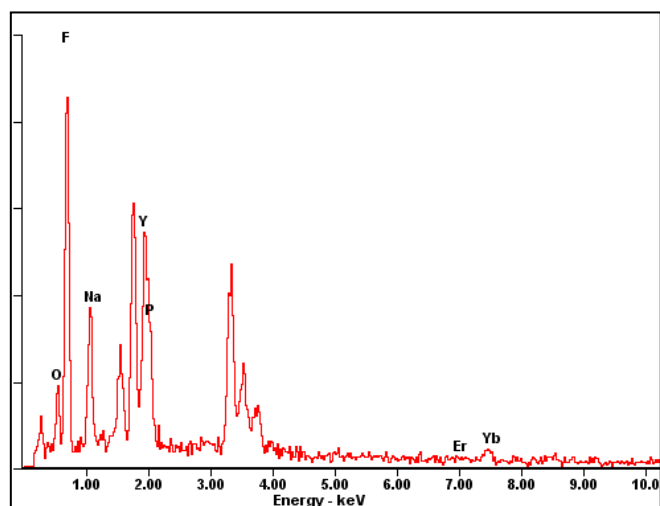

**Fig. S2** EDX analysis spectrum of UCNPs-seq 1.

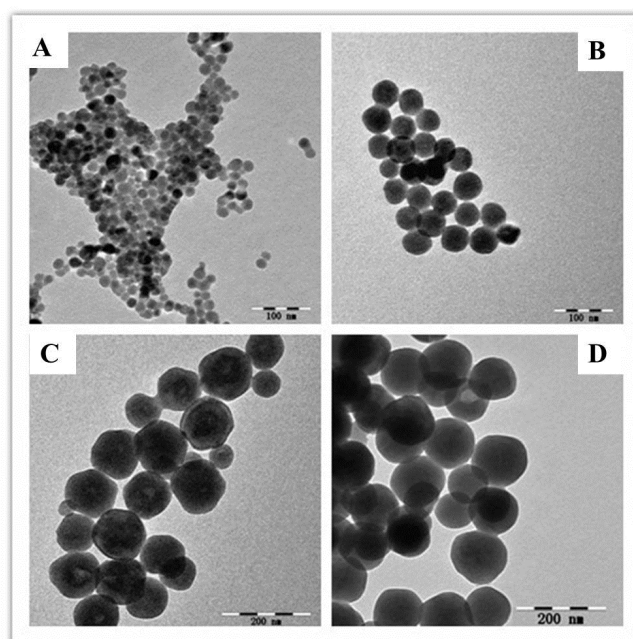

**Fig. S3** TEM images of  $\text{NH}_2$ -UCNPs synthesized with different F/Ln molar ratios at 200 °C for 24 h. F/Ln=4(A), F/Ln=6(B), F/Ln=8(C), F/Ln=10(D). The scale bar for A and B =100 nm, the scale bar for C and D =200 nm.

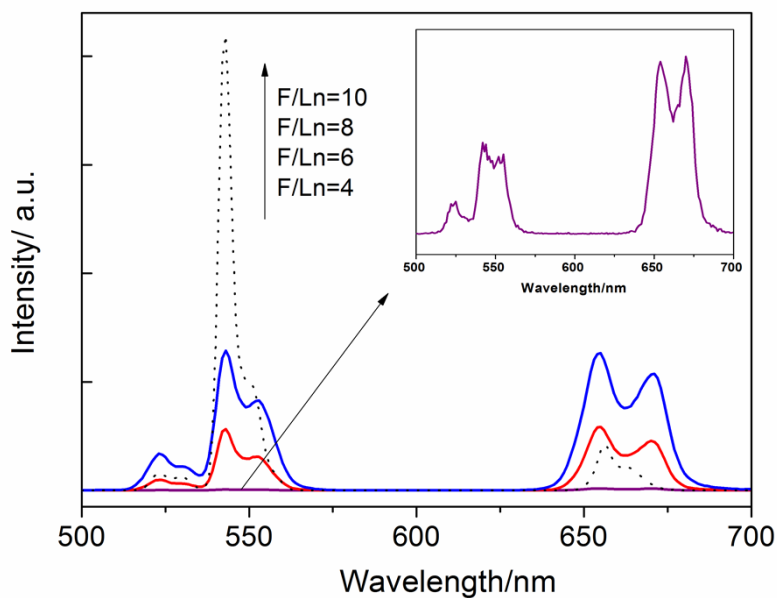

**Fig. S4** The UCL of NH<sub>2</sub>-UCNPs synthesized with different F/Ln molar ratios at 200 °C for 24 h, inset: amplified UCL of F/Ln=4 (the concentration is fixed at 0.5 mg·mL<sup>-1</sup>).

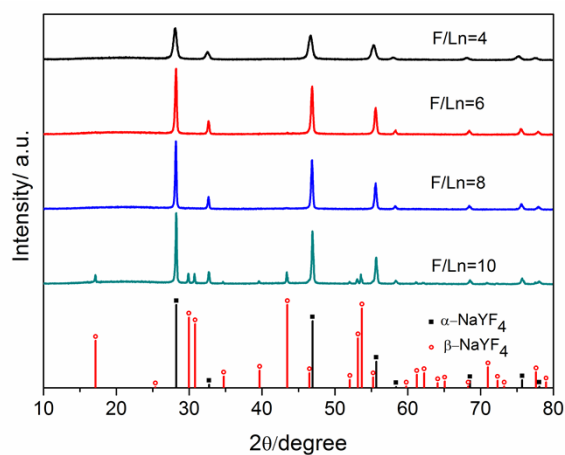

**Fig. S5** XRD patterns of NH<sub>2</sub>-UCNPs synthesized with different F/Ln molar ratios at 200 °C for 24 h, α-NaYF<sub>4</sub> (JCPDS no. 77-2042), β -NaYF<sub>4</sub> (JCPDS no. 28-1192).

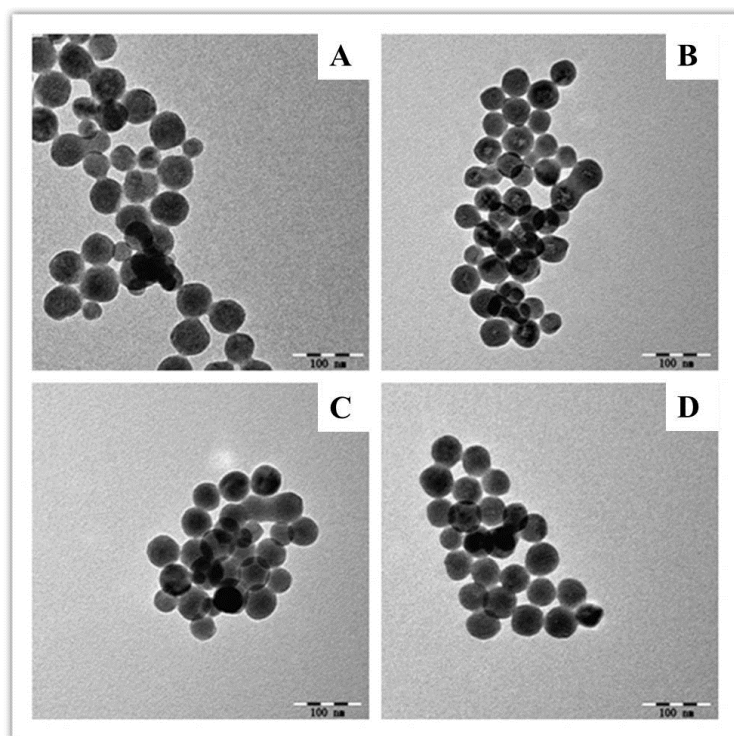

**Fig. S6** TEM images of  $\text{NH}_2\text{-UCNPs}$  synthesized with different reaction time at 200 °C with  $\text{F/Ln}=6$ . 2 h (A), 6 h (B), 12 h (C), 24 h (D). The bar =100 nm.

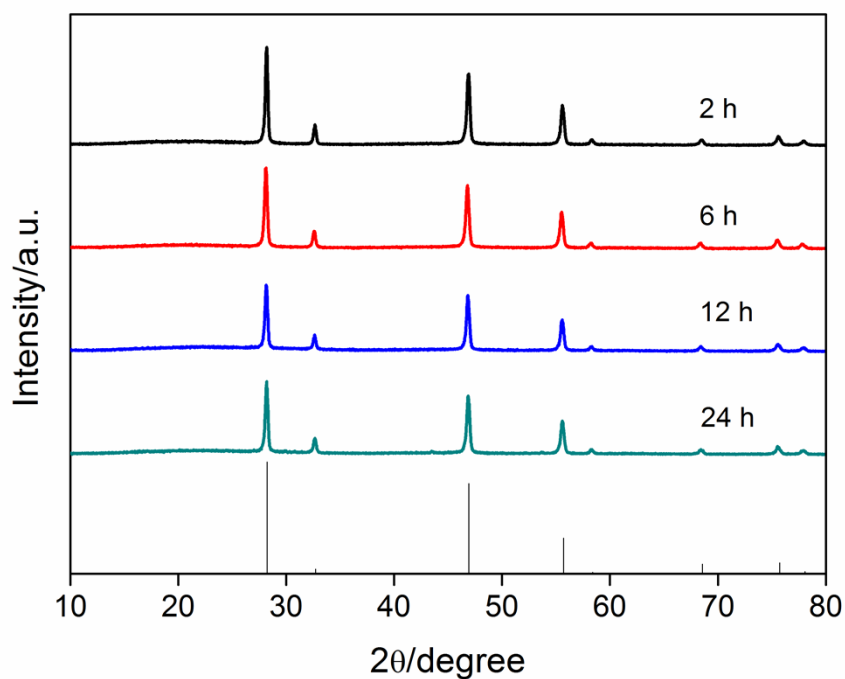

**Fig. S7** XRD patterns of  $\text{NH}_2\text{-UCNPs}$  synthesized with different reaction time at 200 °C with  $\text{F/Ln}=6$ ,  $\alpha\text{-NaYF}_4$  (JCPDS no. 77-2042).

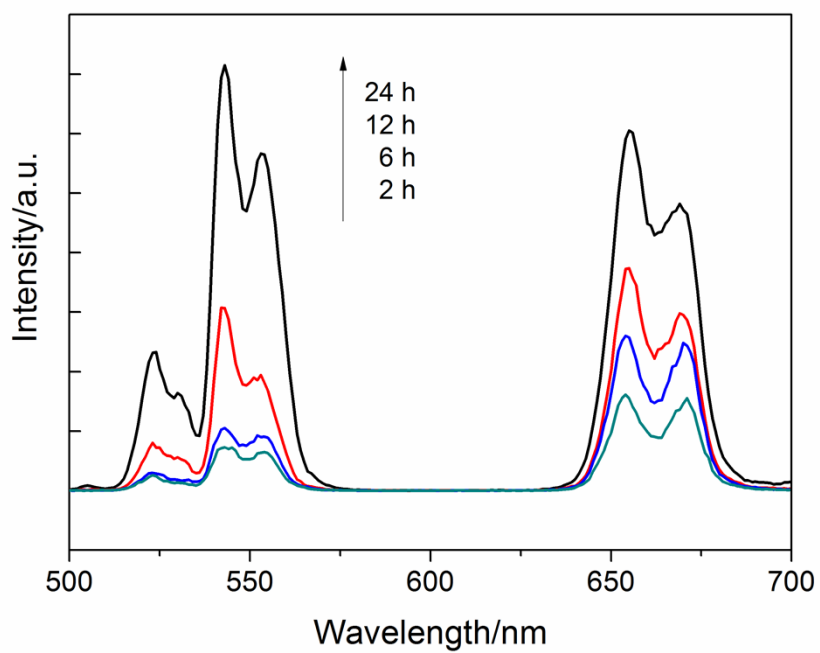

**Fig. S8** The UCL of NH<sub>2</sub>-UCNPs synthesized with different reaction time at 200 °C with F/Ln=6, the concentration is fixed at 0.5 mg·mL<sup>-1</sup>.

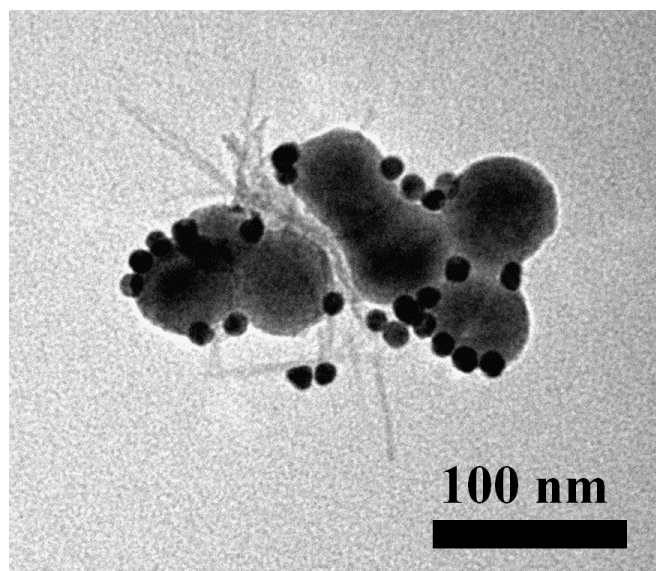

**Fig. S9** TEM image of the UCNPs-seq 1 assembled with Au NPs-seq 2.
